# Supplementary material for: Understanding the cumulative risk of maternal prenatal biopsychosocial factors on birth weight: a DynaHEALTH study on two birth cohorts
Source: PubMed Central journal article supplement — J Epidemiol Community Health. 2020 Nov 1;74(11):933–41. doi: 10.1136/jech-2019-213154 (PMC7577640; doi:10.1136/jech-2019-213154), 2020-11-01
Supplement: jech-2019-213154s001.pdf [file jech-2019-213154s001.pdf]

## Supplementary methods, figures and tables

### Table of Contents

|                                                                                                                                                                                                                                                                                                                                                 |    |
|-------------------------------------------------------------------------------------------------------------------------------------------------------------------------------------------------------------------------------------------------------------------------------------------------------------------------------------------------|----|
| <b>Supplementary Methods</b> .....                                                                                                                                                                                                                                                                                                              | 2  |
| <b>Figure S1</b> Flowchart of the study design .....                                                                                                                                                                                                                                                                                            | 5  |
| <b>Table S1</b> Association of 22 <i>a priori</i> based selected maternal bio-psychosocial observed variables with birthweight SD scores corrected for gestational age and sex in the NFBC 1986 and the Generation R Study                                                                                                                      | 6  |
| <b>Table S2</b> Exploratory factor analysis of 18 maternal bio-psychosocial measures that were associated with birthweight SD scores corrected for gestational age and sex in the NFBC1986 (n=8330).....                                                                                                                                        | 8  |
| <b>Figure S2</b> Scree plot for exploratory factor analysis of 18 maternal bio-psychosocial measures in the NFBC1986 .....                                                                                                                                                                                                                      | 9  |
| <b>Figure S3</b> Correlation matrix between 18 maternal bio-psychosocial measures in the NFBC1986 and the Generation R study.....                                                                                                                                                                                                               | 10 |
| <b>Table S3</b> Stepwise association of four latent factors: ‘Factor1-BMI’, ‘Factor2-DBP’, ‘Factor3-Socioeconomic-Obstetric Profile (SOP)’ and ‘Factor4-Parental-Lifestyle’ with birthweight SD score corrected for gestational age and sex and sequentially adjusted for other latent factors in the NFBC1986 and the Generation R Study ..... | 11 |
| <b>Table S4</b> Association between cumulative BPS score with birthweight SD scores corrected for gestational age and sex in the NFBC1986 and the Generation R Study.....                                                                                                                                                                       | 13 |
| <b>Table S5</b> Frequency of maternal smoking and alcohol use during pregnancy in different ethnicities in the Generation R Study.....                                                                                                                                                                                                          | 14 |
| <b>Table S6</b> Association of different ethnicities with birthweight SD scores corrected for gestational age and sex in the Generation R Study .....                                                                                                                                                                                           | 15 |
| <b>Figure S4.</b> Sensitivity analysis showing forest plot of association of four latent factors with small for gestational age in the NFBC1986 and the Generation R Study.....                                                                                                                                                                 | 16 |
| <b>Figure S5.</b> Sensitivity analysis showing forest plot of association of four latent factors with large for gestational age in the NFBC1986 and the Generation R Study.....                                                                                                                                                                 | 17 |
| <b>Table S7.</b> Sensitivity analysis of association of four latent factors: ‘Factor1-BMI’, ‘Factor2-DBP’, ‘Factor3-Socioeconomic-Obstetric Profile (SOP)’ and ‘Factor4-Parental-Lifestyle’ with SGA and LGA sequentially adjusted for other latent factors in the NFBC1986 and the Generation R study.....                                     | 18 |

## Supplementary Methods

| Variable                                        | Data collection method        | Type of variable | Measurement methods                                                                                                                                                                                                                                                                                                                                                                                                                                      |
|-------------------------------------------------|-------------------------------|------------------|----------------------------------------------------------------------------------------------------------------------------------------------------------------------------------------------------------------------------------------------------------------------------------------------------------------------------------------------------------------------------------------------------------------------------------------------------------|
| <b>Maternal</b>                                 |                               |                  |                                                                                                                                                                                                                                                                                                                                                                                                                                                          |
| Body Mass Index (kg/m <sup>2</sup> )            | Clinical examination          | Continuous       | NFBC1986 - A trained nurse carried out mother's clinical examinations during multiple antenatal visits. Height was recorded at the first visit. Weight was recorded at multiple time – at first visit, 20 <sup>th</sup> week and last antenatal visit. Weight before pregnancy was self-recorded through questionnaire. Height and weight were measured to an accuracy of 0.1 cm and 0.1 kg and were converted into pre-pregnancy and end pregnancy BMI. |
|                                                 |                               |                  | Generation R - Maternal examination was carried out by assessing height (cm) and weight (kg) measured without shoes and heavy clothing. Weight was measured at multiple ante-natal visits by trained nurse. Pre-pregnancy weight was self-recorded through questionnaire. Height and weight were converted into pre-pregnancy and end-pregnancy BMI.                                                                                                     |
| Blood Pressure (Systolic and Diastolic) (mm Hg) | Clinical examination          | Continuous       | NFBC1986 – Trained nurses measured Systolic and Diastolic blood pressure with mercury sphygmomanometer in sitting position from the right arm after 15 minutes of rest. The readings were recorded at the 20 <sup>th</sup> , 30-36 <sup>th</sup> and 40 <sup>th</sup> week of pregnancy. Two readings were taken 2 minutes apart, and the average of the measurements was used.                                                                          |
|                                                 |                               |                  | Generation R - Blood pressure was examined at each antenatal visit with mercury sphygmomanometer in sitting position.                                                                                                                                                                                                                                                                                                                                    |
| Haemoglobin (g/dl)                              | Clinical examination          | Continuous       | NFBC1986 and Generation R – This was measured during first antenatal visit                                                                                                                                                                                                                                                                                                                                                                               |
| Age (years)                                     | Questionnaire – self reported | Continuous       | NFBC1986 and Generation R - The age of the mother was assessed at enrolment.                                                                                                                                                                                                                                                                                                                                                                             |

|                                  |                               |             |                                                                                                                                                                                                                              |
|----------------------------------|-------------------------------|-------------|------------------------------------------------------------------------------------------------------------------------------------------------------------------------------------------------------------------------------|
| Education                        | Questionnaire – self reported | Categorical | NFBC 1986 and Generation R - Maternal education was assessed by highest completed level of education classified into three categories: Basic (primary school), secondary (secondary school) and tertiary (higher education). |
| Employment                       | Questionnaire – self reported | Categorical | NFBC1986 and Generation R - Maternal employment was categorized into 'employed' and 'unemployed'.                                                                                                                            |
| Working position                 | Questionnaire – self reported | Categorical | NFBC1986 and Generation R - Maternal working position during employment was categorized as: 'standing or moving' and 'sitting'                                                                                               |
| Marital status                   | Questionnaire – self reported | Categorical | NFBC1986 and Generation R- Marital status was categorized into 2 categories from 5 sub-categories as:<br>Married - 'married or cohabiting'<br>Unmarried - 'unmarried, widowed or divorced'.                                  |
| House ownership                  | Questionnaire – self reported | Categorical | NFBC1986 and Generation R - House ownership was defined as:<br>Yes - living in own house<br>No - living in rented house                                                                                                      |
| Parity                           | Questionnaire – self reported | Categorical | NFBC1986 and Generation R - Parity was defined as number of previous children and categorized as:<br>Nulliparous – No previous children<br>Multiparous – One or more previous children                                       |
| Pregnancy desirability           | Questionnaire – self reported | Categorical | NFBC1986 and Generation R - Pregnancy desirability was categorised as 'yes' and 'no' depending on the desirability of this pregnancy to the mother.                                                                          |
| Previous pregnancy complications | Questionnaire – self reported | Categorical | NFBC1986 and Generation R – It was dichotomized as:<br>No (no previous pregnancy complications)<br>Yes (having miscarriages and/or still births in previous pregnancy)                                                       |
| Smoking                          | Questionnaire – self reported | Categorical | NFBC1986 and Generation R - Maternal smoking was assessed by asking pregnant mothers whether they smoked at any time during pregnancy and was classified as 'Yes' and otherwise 'No'.                                        |

|                                                              |                               |             |                                                                                                                                                                                                                      |
|--------------------------------------------------------------|-------------------------------|-------------|----------------------------------------------------------------------------------------------------------------------------------------------------------------------------------------------------------------------|
| Alcohol use                                                  | Questionnaire – self reported | Categorical | NFBC1986 and Generation R - Maternal alcohol consumption was assessed by asking pregnant mothers whether they consumed alcohol at any time during pregnancy and was classified as 'Yes' and otherwise 'No'.          |
| Ethnicity                                                    | Questionnaire – self reported | Categorical | NFBC1986 – It is a homogeneous cohort including mothers of only Finnish ethnicity.                                                                                                                                   |
|                                                              |                               |             | Generation R - Ethnicity of the mother was classified into seven categories: Dutch and other European, Surinamese, Turkish, Moroccan, Cape Verdean, Dutch Antilles and others.                                       |
| Paternal                                                     |                               |             |                                                                                                                                                                                                                      |
| Body Mass Index (kg/m <sup>2</sup> )                         | Questionnaire – self reported | Continuous  | NFBC1986 and Generation R – Height and weight was self reported through questionnaire and were then converted to BMI.                                                                                                |
| Smoking                                                      | Questionnaire – self reported | Categorical | NFBC1986 and Generation R - Paternal smoking was assessed by asking whether they smoke and was classified as 'Yes' and otherwise 'No'.                                                                               |
| Alcohol use                                                  | Questionnaire – self reported | Categorical | NFBC1986 and Generation R - Paternal alcohol consumption was assessed by asking whether they consume alcohol and was classified as 'Yes' and otherwise 'No'.                                                         |
| Employment                                                   | Questionnaire – self reported | Categorical | NFBC1986 and Generation R - Paternal employment was categorized into 'employed' and 'unemployed'.                                                                                                                    |
| Offspring                                                    |                               |             |                                                                                                                                                                                                                      |
| Gestational age (weeks)                                      | Clinical measurement          | Continuous  | NFBC1986 and Generation R - Gestational age was established by last menstrual period of the mother and cross-evaluated through ultrasound examination.                                                               |
| Birth weight (grams)                                         | Clinical measurement          | Continuous  | NFBC1986 - Birthweight of the offspring was measured by nurse in grams immediately after birth.<br>Generation R - Medical records completed by obstetricians and community midwives were used to obtain birthweight. |
| Abbreviations: NFBC1986: Northern Finland Birth Cohort 1986. |                               |             |                                                                                                                                                                                                                      |

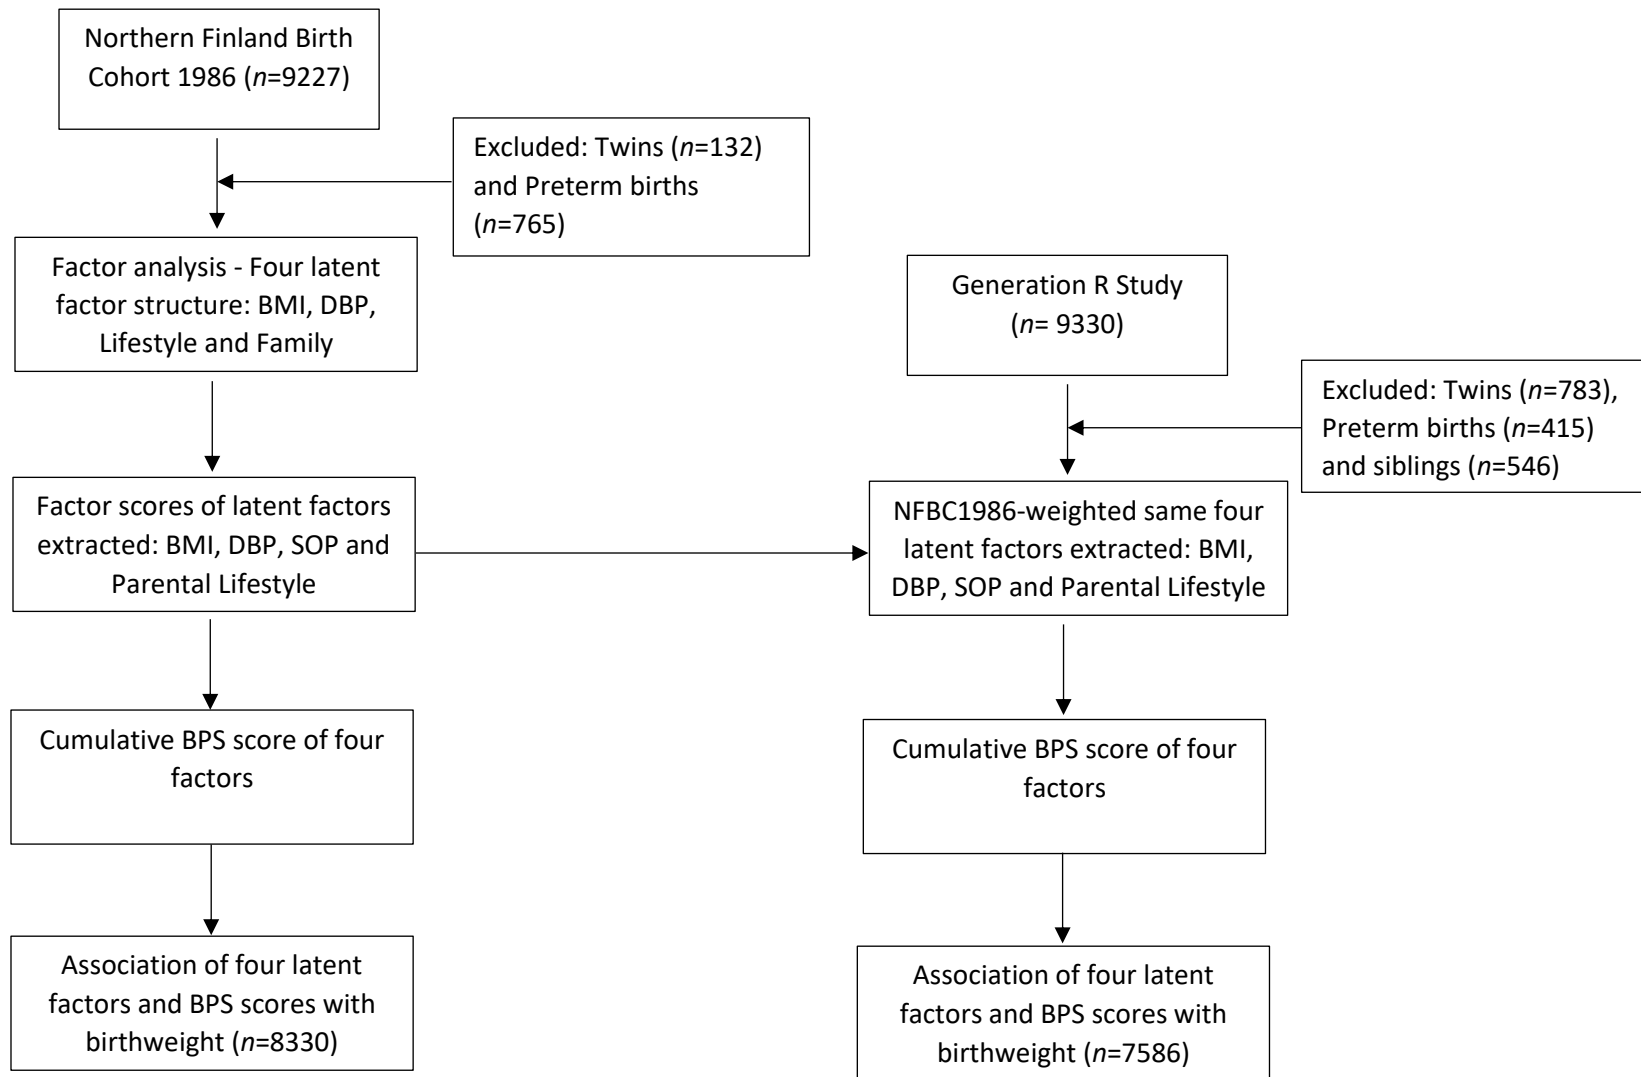

**Figure S1** Flowchart of the study design

Note: BMI: Body Mass Index; BPS: Biopsychosocial; CI: Confidence Interval; DBP: Diastolic Blood Pressure; NFBC1986: Northern Finland Birth Cohort 1986; SOP: Socioeconomic-Obstetric Profile.

**Table S1** Association of 22 *a priori* based selected maternal bio-psychosocial observed variables with birthweight SD scores corrected for gestational age and sex in the NFBC 1986 and the Generation R Study

| Observed variables                               | NFBC1986 (n = 8330) |                |         | Generation R (n = 7586) |               |         |
|--------------------------------------------------|---------------------|----------------|---------|-------------------------|---------------|---------|
|                                                  | Estimate            | 95% CI         | P-value | Estimate                | 95% CI        | P-value |
| <b>Biological (units)</b>                        |                     |                |         |                         |               |         |
| Pre-pregnancy BMI (kg/m <sup>2</sup> )           | 0.17                | 0.15, 0.19     | <0.0001 | 0.16                    | 0.12, 0.18    | <0.0001 |
| End-pregnancy BMI (kg/m <sup>2</sup> )           | 0.22                | 0.20, 0.24     | <0.0001 | 0.21                    | 0.19, 0.23    | <0.0001 |
| DBP at 20 weeks (mm Hg)                          | 0.04                | 0.02, 0.06     | 0.0006  | 0.004                   | -0.02, 0.03   | 0.75    |
| SBP at 20 weeks (mm Hg)                          | 0.01                | -0.008, 0.04   | 0.21    | 0.06                    | 0.04, 0.08    | <0.0001 |
| DBP at 30-36 weeks (mm Hg)                       | -0.03               | -0.06, -0.01   | 0.003   | -0.03                   | -0.05, -0.003 | 0.03    |
| SBP at 30-36 weeks (mm Hg)                       | -0.01               | -0.04, 0.008   | 0.21    | 0.06                    | 0.04, 0.08    | <0.0001 |
| Haemoglobin at first antenatal visit (g/dl)      | -0.003              | -0.006, -0.001 | 0.002   | 0.004                   | 0.003, 0.008  | 0.03    |
| Paternal BMI (kg/m <sup>2</sup> )                | 0.03                | 0.02, 0.04     | <0.0001 | 0.05                    | 0.02, 0.08    | 0.0003  |
| <b>Material, social and behavioural measures</b> |                     |                |         |                         |               |         |
| House ownership (No)                             | -0.14               | -0.11, -0.18   | <0.0001 | -0.24                   | -0.29, -0.19  | <0.0001 |
| Marital status (Unmarried)                       | -0.31               | -0.40, -0.23   | <0.0001 | -0.39                   | -0.46, -0.32  | <0.0001 |
| Maternal age (years)                             | 0.11                | 0.09, 0.13     | <0.0001 | 0.13                    | 0.11, 0.16    | <0.0001 |
| Maternal alcohol use (Yes)                       | -0.17               | -0.24, -0.11,  | <0.0001 | 0.11                    | 0.05, 0.16    | <0.0001 |
| Maternal education (Primary)                     | -0.12               | -0.20, -0.04   | <0.0001 | -0.13                   | -0.17, -0.10  | <0.0001 |
| Maternal employment (Unemployed)                 | -0.09               | -0.16, -0.02   | <0.0001 | -0.16                   | -0.21, -0.09  | <0.0001 |
| Maternal smoking (Yes)                           | -0.32               | -0.37, -0.26   | <0.0001 | -0.47                   | -0.55, -0.39  | <0.0001 |
| Maternal working position (Standing/moving)      | -0.02               | -0.07, 0.04    | 0.34    | -0.05                   | -0.08, -0.02  | 0.001   |
| Parity (Multiparous)                             | 0.40                | 0.28, 0.47     | <0.0001 | 0.38                    | 0.33, 0.42    | <0.0001 |
| Pregnancy desirability (No)                      | -0.10               | -0.17, -0.03   | 0.001   | 0.002                   | -0.20, 0.21   | 0.98    |
| Previous pregnancy complications (Yes)           | 0.09                | 0.04, 0.14     | 0.0005  | -0.08                   | -0.14, -0.008 | 0.03    |
| Paternal smoking (Yes)                           | -0.12               | -0.16, -0.09   | <0.0001 | -0.36                   | -0.43, -0.30  | <0.0001 |
| Paternal alcohol use (Yes)                       | -0.13               | -0.17, -0.08   | <0.0001 | 0.13                    | 0.05, 0.21    | 0.002   |

|                                                                                                                                                                    |       |             |      |       |                  |       |
|--------------------------------------------------------------------------------------------------------------------------------------------------------------------|-------|-------------|------|-------|------------------|-------|
| Paternal employment<br>(Unemployed)                                                                                                                                | -0.02 | -0.07, 0.02 | 0.41 | -0.15 | -0.26, -<br>0.04 | 0.008 |
| Abbreviations: BMI: Body Mass Index; CI: Confidence Interval; DBP: Diastolic Blood Pressure; NFBC1986: Northern Finland Birth Cohort 1986; SD: Standard Deviation. |       |             |      |       |                  |       |

**Table S2** Exploratory factor analysis of 18 maternal biopsychosocial measures that were associated with birthweight SD scores corrected for gestational age and sex in the NFBC1986 (n=8330)

| Observed variables                                                                                                                                                                                                                                                                                                                                                                                                                                                                                                                                                                                                                                                                                                                                                                                                                                                          | Factor 1     | Factor 2     | Factor 3      | Factor 4     |
|-----------------------------------------------------------------------------------------------------------------------------------------------------------------------------------------------------------------------------------------------------------------------------------------------------------------------------------------------------------------------------------------------------------------------------------------------------------------------------------------------------------------------------------------------------------------------------------------------------------------------------------------------------------------------------------------------------------------------------------------------------------------------------------------------------------------------------------------------------------------------------|--------------|--------------|---------------|--------------|
| Pre-pregnancy BMI                                                                                                                                                                                                                                                                                                                                                                                                                                                                                                                                                                                                                                                                                                                                                                                                                                                           | <b>0.977</b> | 0.013        | 0.029         |              |
| End pregnancy BMI                                                                                                                                                                                                                                                                                                                                                                                                                                                                                                                                                                                                                                                                                                                                                                                                                                                           | <b>0.857</b> | 0.038        |               |              |
| DBP at 20 <sup>th</sup> week                                                                                                                                                                                                                                                                                                                                                                                                                                                                                                                                                                                                                                                                                                                                                                                                                                                | 0.094        | <b>0.637</b> | 0.084         |              |
| DBP at 36 <sup>th</sup> week                                                                                                                                                                                                                                                                                                                                                                                                                                                                                                                                                                                                                                                                                                                                                                                                                                                | 0.042        | <b>0.730</b> | -0.061        | -0.031       |
| Haemoglobin at first visit                                                                                                                                                                                                                                                                                                                                                                                                                                                                                                                                                                                                                                                                                                                                                                                                                                                  | 0.111        | 0.200        | -0.091        |              |
| House ownership (no)                                                                                                                                                                                                                                                                                                                                                                                                                                                                                                                                                                                                                                                                                                                                                                                                                                                        |              |              | <b>-0.546</b> | 0.057        |
| Marital status (unmarried)                                                                                                                                                                                                                                                                                                                                                                                                                                                                                                                                                                                                                                                                                                                                                                                                                                                  |              |              | <b>-0.513</b> | 0.295        |
| Maternal age                                                                                                                                                                                                                                                                                                                                                                                                                                                                                                                                                                                                                                                                                                                                                                                                                                                                |              | 0.066        | <b>0.829</b>  | 0.073        |
| Maternal alcohol use (yes)                                                                                                                                                                                                                                                                                                                                                                                                                                                                                                                                                                                                                                                                                                                                                                                                                                                  | -0.048       |              | 0.091         | <b>0.696</b> |
| Maternal education (primary)                                                                                                                                                                                                                                                                                                                                                                                                                                                                                                                                                                                                                                                                                                                                                                                                                                                | 0.190        | -0.087       | -0.058        | 0.097        |
| Maternal employment (unemployed)                                                                                                                                                                                                                                                                                                                                                                                                                                                                                                                                                                                                                                                                                                                                                                                                                                            | 0.091        | -0.099       | -0.247        | -0.083       |
| Maternal smoking (yes)                                                                                                                                                                                                                                                                                                                                                                                                                                                                                                                                                                                                                                                                                                                                                                                                                                                      | 0.063        | -0.187       | -0.102        | <b>0.606</b> |
| Multi-parity                                                                                                                                                                                                                                                                                                                                                                                                                                                                                                                                                                                                                                                                                                                                                                                                                                                                | 0.108        | -0.250       | <b>0.572</b>  | -0.060       |
| Paternal alcohol use (yes)                                                                                                                                                                                                                                                                                                                                                                                                                                                                                                                                                                                                                                                                                                                                                                                                                                                  | -0.078       | 0.042        | 0.024         | <b>0.829</b> |
| Paternal BMI                                                                                                                                                                                                                                                                                                                                                                                                                                                                                                                                                                                                                                                                                                                                                                                                                                                                | 0.139        |              | 0.262         | 0.106        |
| Paternal smoking (yes)                                                                                                                                                                                                                                                                                                                                                                                                                                                                                                                                                                                                                                                                                                                                                                                                                                                      | 0.066        | -0.115       | -0.133        | <b>0.415</b> |
| Pregnancy desirability (no)                                                                                                                                                                                                                                                                                                                                                                                                                                                                                                                                                                                                                                                                                                                                                                                                                                                 | 0.067        |              | -0.280        | 0.216        |
| Previous pregnancy complications (yes)                                                                                                                                                                                                                                                                                                                                                                                                                                                                                                                                                                                                                                                                                                                                                                                                                                      | 0.037        | -0.058       | <b>-0.382</b> |              |
| <b>Factor correlations</b>                                                                                                                                                                                                                                                                                                                                                                                                                                                                                                                                                                                                                                                                                                                                                                                                                                                  |              |              |               |              |
| Factor 2                                                                                                                                                                                                                                                                                                                                                                                                                                                                                                                                                                                                                                                                                                                                                                                                                                                                    | 0.232        | -            |               |              |
| Factor 3                                                                                                                                                                                                                                                                                                                                                                                                                                                                                                                                                                                                                                                                                                                                                                                                                                                                    | 0.256        | -0.214       | -             |              |
| Factor 4                                                                                                                                                                                                                                                                                                                                                                                                                                                                                                                                                                                                                                                                                                                                                                                                                                                                    | -0.007       | -0.060       | -0.273        | -            |
| <p>Model fit indices: RMSEA: 0.049 (95% CI 0.046-0.052); CFI: 0.905; TLI: 0.832; <math>\chi^2</math>: 9194.31 [153], <math>P &lt; 0.0001</math></p> <p>Values are factor loadings for exploratory factor analysis using geomin rotations. Results are shown for full dataset</p> <p>Empty square represent loading with <math>P &gt; 0.05</math>. All shaded and bold font represent factor loading greater than 0.3.</p> <p>Five observed variables with low factor loadings (<math>&lt; 0.3</math>) were excluded from the subsequent analysis. Based on univariate associations (Table S1), categorical variables were coded as 0/1, where 1 represents higher risk of reduced birthweight</p> <p>Abbreviations: BMI: Body Mass Index; CI: Confidence Interval; DBP: Diastolic Blood Pressure; NFBC1986: Northern Finland Birth Cohort 1986; SD: Standard Deviation.</p> |              |              |               |              |



**Figure S2** Scree plot for exploratory factor analysis of 18 maternal bio-psychosocial measures in the NFBC1986

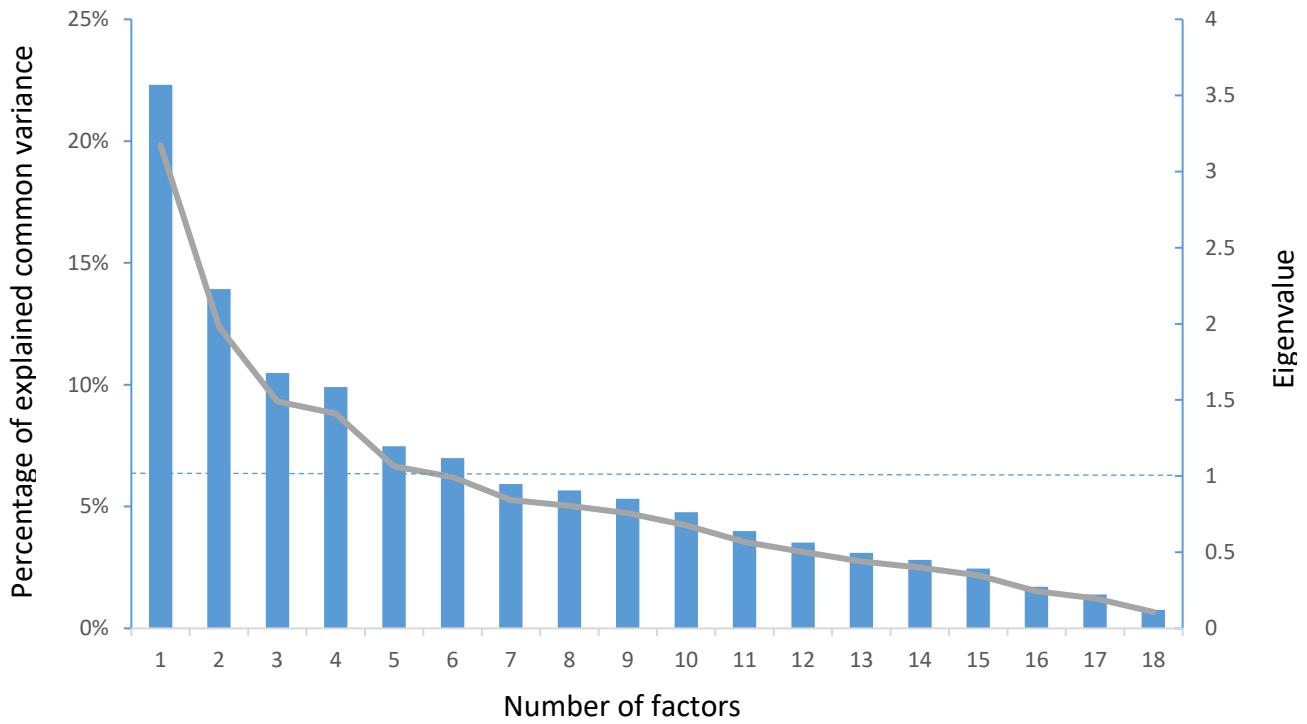

Note: Dashed line demonstrating six factors with an eigenvalue above one.

**Figure S3** Correlation matrix between 18 maternal bio-psychosocial measures in the NFBC1986 and the Generation R study

**NFBC1986**

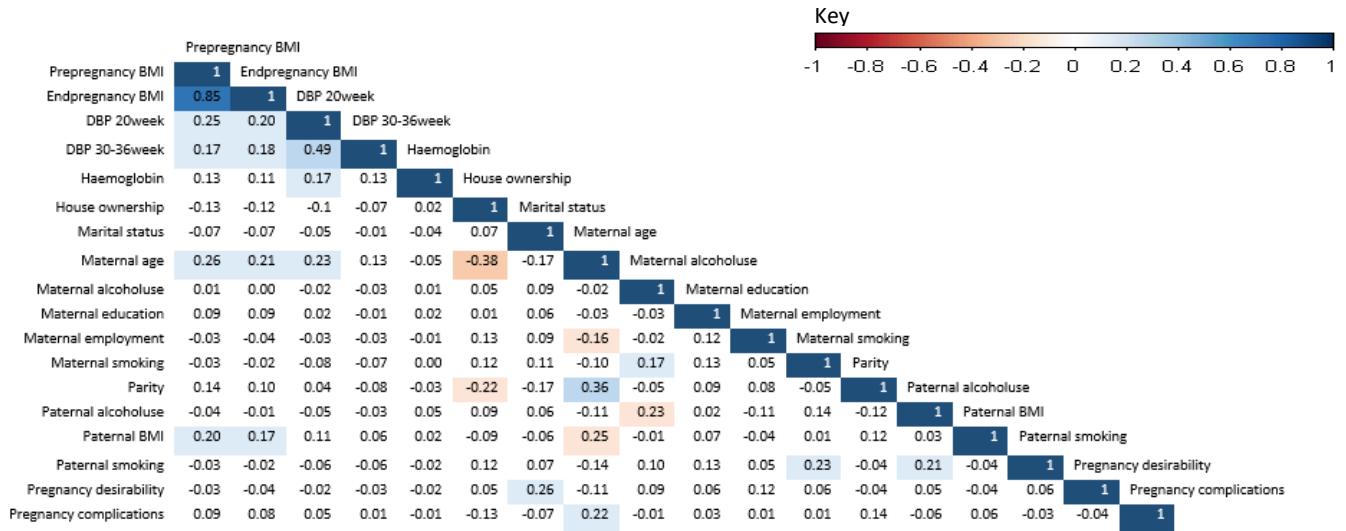

**Generation R**

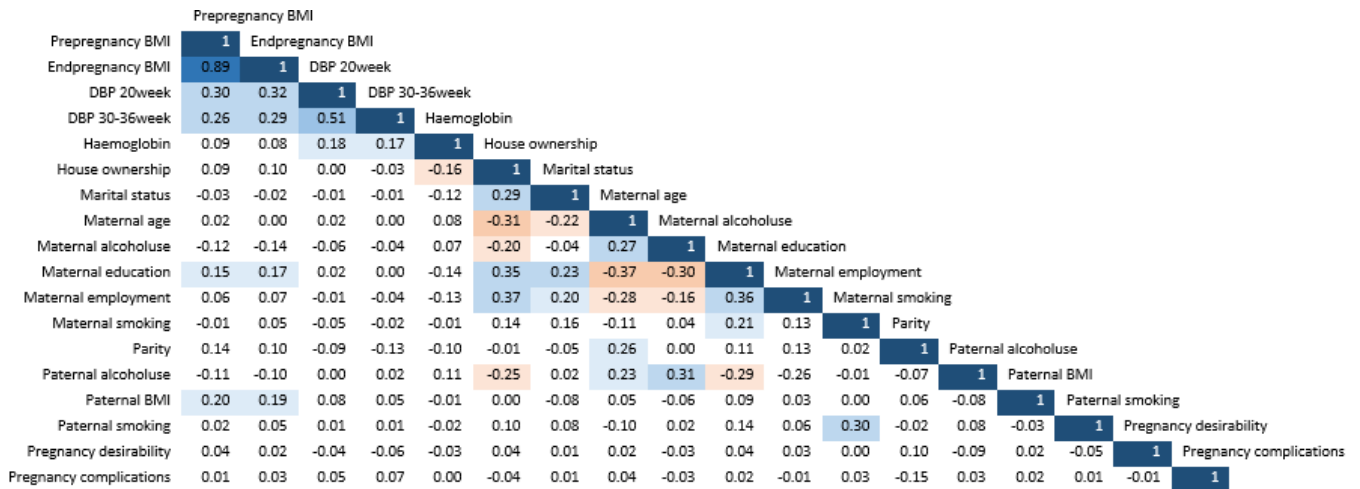

Note: Values are Pearson correlation coefficients between factors. BMI: Body Mass Index, DBP: Diastolic Blood Pressure, NFBC1986: Northern Finland Birth Cohort 1986

**Table S3** Stepwise association of four latent factors: ‘Factor1-BMI’, ‘Factor2-DBP’, ‘Factor3-Socioeconomic-Obstetric Profile (SOP)’ and ‘Factor4-Parental-Lifestyle’ with birthweight SD score corrected for gestational age and sex and sequentially adjusted for other latent factors in the NFBC1986 and the Generation R Study

| Latent factors                                      | NFBC1986                   |               |         | Generation R               |              |         |
|-----------------------------------------------------|----------------------------|---------------|---------|----------------------------|--------------|---------|
|                                                     | Estimate (SD) <sup>a</sup> | 95% CI        | P value | Estimate (SD) <sup>a</sup> | 95% CI       | P value |
| <b>Factor1-BMI (Model 1)</b>                        | 0.24                       | 0.22, 0.26    | <0.0001 | 0.19                       | 0.17, 0.21   | <0.0001 |
| +F2-DBP                                             | 0.25                       | 0.23, 0.28    | <0.0001 | 0.25                       | 0.22, 0.28   | <0.0001 |
| +F3-SOP                                             | 0.16                       | 0.13, 0.18    | <0.0001 | 0.18                       | 0.16, 0.20   | <0.0001 |
| +F4-Lifestyle                                       | 0.19                       | 0.17, 0.22    | <0.0001 | 0.19                       | 0.17, 0.22   | <0.0001 |
| +F2-DBP+F3-SOP                                      | 0.19                       | 0.16, 0.21    | <0.0001 | 0.23                       | 0.20, 0.26   | <0.0001 |
| +F2-DBP+ F4Lifestyle                                | 0.23                       | 0.20, 0.25    | <0.0001 | 0.25                       | 0.22, 0.28   | <0.0001 |
| +F4-Lifestyle+F3-SOP                                | 0.17                       | 0.14, 0.19    | <0.0001 | 0.16                       | 0.14, 0.19   | <0.0001 |
| +Adjusted for all latent factors ( <b>Model 2</b> ) | 0.20                       | 0.17, 0.22    | <0.0001 | 0.21                       | 0.19, 0.24   | <0.0001 |
| +Ethnicity                                          | -                          | -             | -       | 0.21                       | 0.18, 0.23   | <0.0001 |
| +Fully adjusted with ethnicity ( <b>Model 3</b> )   | -                          | -             | -       | 0.23                       | 0.20, 0.26   | <0.0001 |
| <b>Factor2-DBP (Model 1)</b>                        | 0.07                       | 0.05, 0.11    | <0.0001 | 0.03                       | 0.002, 0.06  | 0.03    |
| +F1-BMI                                             | -0.03                      | -0.06, -0.005 | 0.02    | -0.12                      | -0.15, -0.09 | <0.0001 |
| +F3-SOP                                             | -0.01                      | -0.04, 0.02   | 0.41    | 0.03                       | 0.006, 0.06  | 0.02    |
| +F4-Lifestyle                                       | 0.03                       | 0.001, 0.06   | 0.04    | 0.02                       | -0.004, 0.05 | 0.1     |
| +F2-BMI+F3-SOP                                      | -0.12                      | -0.16, -0.08  | <0.0001 | -0.11                      | -0.14, -0.08 | <0.0001 |
| +F1-BMI+F4-Lifestyle                                | -0.13                      | -0.17, -0.10  | <0.0001 | -0.12                      | -0.15, -0.09 | <0.0001 |
| +F3-SOP+F4-Lifestyle                                | -0.04                      | -0.07, -0.003 | 0.03    | 0.01                       | -0.01, 0.04  | 0.33    |
| +Adjusted for all latent factors ( <b>Model 2</b> ) | -0.14                      | -0.18, -0.10  | <0.0001 | -0.11                      | -0.14, -0.08 | <0.0001 |
| +Ethnicity                                          | -                          | -             | -       | 0.03                       | 0.002, 0.06  | 0.03    |
| +Fully adjusted with ethnicity ( <b>Model 3</b> )   | -                          | -             | -       | -0.13                      | -0.16, -0.10 | <0.0001 |
| <b>Factor3-SOP (Model 1)</b>                        | -0.37                      | -0.41, -0.33  | <0.0001 | -0.33                      | -0.37, -0.29 | <0.0001 |
| +F1-BMI                                             | -0.26                      | -0.31, -0.21  | <0.0001 | -0.31                      | -0.35, -0.27 | <0.0001 |
| +F2-DBP                                             | -0.38                      | -0.42, -0.33  | <0.0001 | -0.33                      | -0.37, -0.29 | <0.0001 |
| +F4-SOP                                             | -0.30                      | -0.34, -0.25  | <0.0001 | -0.39                      | -0.43, -0.35 | <0.0001 |
| +F1-BMI+F2-DBP                                      | -0.28                      | -0.32, -0.23  | <0.0001 | -0.30                      | -0.34, -0.27 | 0.007   |
| +F1-BMI+F4-Lifestyle                                | -0.16                      | -0.21, -0.11  | <0.0001 | -0.35                      | -0.39, -0.31 | <0.0001 |
| +F2-DBP+F4Lifestyle                                 | -0.30                      | -0.35, -0.25  | <0.0001 | -0.39                      | -0.43, -0.35 | <0.0001 |
| +Adjusted for all latent factors ( <b>Model 2</b> ) | -0.17                      | -0.22, -0.12  | <0.0001 | -0.34                      | -0.38, -0.30 | <0.0001 |
| +Ethnicity                                          | -                          | -             | -       | -0.30                      | -0.34, -0.26 | <0.0001 |
| +Fully adjusted with ethnicity ( <b>Model 3</b> )   | -                          | -             | -       | -0.29                      | -0.33, -0.25 | <0.0001 |

|                                                   |       |              |         |       |              |         |
|---------------------------------------------------|-------|--------------|---------|-------|--------------|---------|
| <b>Factor4-Lifestyle (Model 1)</b>                | -0.31 | -0.35, -0.26 | <0.0001 | -0.09 | -0.14, -0.04 | 0.0008  |
| +F1-BMI                                           | -0.27 | -0.32, -0.23 | <0.0001 | 0.01  | -0.04, 0.06  | 0.68    |
| +F2-DBP                                           | -0.29 | -0.34, -0.25 | <0.0001 | -0.08 | -0.13, -0.03 | 0.002   |
| +F3-SOP                                           | -0.17 | -0.22, -0.12 | <0.0001 | -0.24 | -0.29, -0.19 | <0.0001 |
| +F1-BMI+F2-DBP                                    | -0.30 | -0.34, -0.25 | <0.0001 | 0.004 | -0.05, 0.05  | 0.89    |
| +F1-BMI+F3-SOP                                    | -0.20 | -0.25, -0.15 | <0.0001 | -0.14 | -0.20, -0.09 | <0.0001 |
| +F2-DBP+F3-SOP                                    | -0.17 | -0.22, -0.12 | <0.0001 | -0.24 | -0.29, -0.19 | <0.0001 |
| <b>+Adjusted for all latent factors (Model 2)</b> | -0.22 | -0.27, -0.17 | <0.0001 | -0.15 | -0.20, -0.10 | <0.0001 |
| +Ethnicity                                        | -     | -            | -       | -0.17 | -0.22, -0.12 | <0.0001 |
| <b>+Fully adjusted with ethnicity (Model 3)</b>   | -     | -            | -       | -0.19 | -0.24, -0.14 | <0.0001 |

<sup>a</sup>Estimates can be interpreted as SD change in birthweight by one unit increase in factor score.

Birthweight was transformed into standard deviation (SD) scores corrected for gestational duration and sex using North European growth standards in the study.

Abbreviations: BMI: Body Mass Index; CI: Confidence Interval; DBP: Diastolic Blood Pressure; F1: Factor1; F2: Factor 2; F3: Factor 3; F4: Factor4; NFBC1986: Northern Finland Birth Cohort 1986; SD: Standard Deviation; SOP: Socioeconomic-Obstetric-Profile.

**Table S4** Association between cumulative BPS score with birthweight SD scores corrected for gestational age and sex in the NFBC1986 and the Generation R Study

| BPS score <sup>a</sup> | NFBC1986                    |              |         | Generation R                |              |         |
|------------------------|-----------------------------|--------------|---------|-----------------------------|--------------|---------|
|                        | Estimates (SD) <sup>b</sup> | 95% CI       | P-value | Estimates (SD) <sup>b</sup> | 95% CI       | P-value |
| 0                      | Reference                   |              |         | Reference                   |              |         |
| 1                      | -0.15                       | -0.41, 0.11  | 0.26    | -0.11                       | -0.43, 0.22  | 0.52    |
| 2                      | -0.19                       | -0.44, 0.05  | 0.12    | -0.03                       | -0.33, 0.27  | 0.84    |
| 3                      | -0.33                       | -0.58, -0.09 | 0.007   | -0.28                       | -0.57, 0.02  | 0.07    |
| 4                      | -0.53                       | -0.77, -0.29 | <0.0001 | -0.42                       | -0.71, -0.13 | 0.005   |
| 5                      | -0.71                       | -0.95, -0.46 | <0.0001 | -0.61                       | -0.91, -0.32 | <0.0001 |
| 6                      | -0.82                       | -1.06, -0.57 | <0.0001 | -0.78                       | -1.07, -0.48 | <0.0001 |
| 7                      | -0.88                       | -1.14, -0.62 | <0.0001 | -0.95                       | -1.27, -0.62 | <0.0001 |
| 8                      | -1.26                       | -1.58, -0.94 | <0.0001 | -0.74                       | -1.18, -0.31 | 0.0008  |

<sup>a</sup>BPS score is cumulative score of four factors ranging from 0 to 8; 'Factor1-BMI' (graded 0-2 in descending order), 'Factor2-DBP' (graded 0-2 in ascending order), 'Factor3-Socioeconomic Obstetric Profile' (graded 0-2 in ascending order), and 'Factor4-Parental Lifestyle' (graded 0-2 in ascending order). The increasing grade indicating less optimal 'DBP', 'Socioeconomic Obstetric Profile' and 'Parental Lifestyle' factors. The reference category is BPS score of 0.

<sup>b</sup>Estimates represents the SD decrease in birthweight by one unit increase in BPS score.

Birthweight was transformed into standard deviation (SD) scores corrected for gestational age and sex using North European growth standards in the study.

Abbreviations: BPS: Biopsychosocial; CI: Confidence Interval; NFBC1986: Northern Finland Birth Cohort 1986; SD: Standard Deviation.

**Table S5** Frequency of maternal smoking and alcohol use during pregnancy in different ethnicities in the Generation R Study

|                                    | <b>N</b> | <b>Smoking</b> | <b>Alcohol use</b> |
|------------------------------------|----------|----------------|--------------------|
| European                           | 4013     | 689 (18.5%)    | 1772 (47.9%)       |
| Non-European                       | 3159     | 529 (18.4%)    | 591 (20.8%)        |
| <b>Non-European sub-categories</b> |          |                |                    |
| African                            | 150      | 14 (10.5%)     | 36 (27.3%)         |
| Dutch Antillean                    | 249      | 47 (20.1%)     | 69 (29.9%)         |
| Asian                              | 227      | 7 (3.5%)       | 42 (20.9%)         |
| Cape Verdean                       | 319      | 59 (21.4%)     | 80 (29.1%)         |
| Indonesian                         | 204      | 34 (17.3%)     | 96 (49.2%)         |
| Moroccan                           | 527      | 23 (5.0%)      | 14 (3.0 %)         |
| Surinamese                         | 647      | 126 (20.9%)    | 158 (26.8%)        |
| Turkish                            | 687      | 201 (31.8%)    | 42 (6.9%)          |
|                                    |          | Missing = 989  | Missing = 1052     |

**Table S6** Association of different ethnicities with birthweight SD scores corrected for gestational age and sex in the Generation R Study

|                                                                                                                                                                                                                                                                                  | <b>Estimate (SD)</b> | <b>Lower 95% CI</b> | <b>Upper 95% CI</b> | <b>P value</b> |
|----------------------------------------------------------------------------------------------------------------------------------------------------------------------------------------------------------------------------------------------------------------------------------|----------------------|---------------------|---------------------|----------------|
| European                                                                                                                                                                                                                                                                         | 0.00 (Reference)     |                     |                     |                |
| <b>Non-European sub-categories</b>                                                                                                                                                                                                                                               |                      |                     |                     |                |
| African                                                                                                                                                                                                                                                                          | 0.16                 | -0.20               | 0.51                | 0.39           |
| Dutch Antillean                                                                                                                                                                                                                                                                  | -0.30                | -0.43               | -0.17               | <0.0001        |
| Asian                                                                                                                                                                                                                                                                            | -0.03                | -0.16               | 0.11                | 0.72           |
| Cape Verdean                                                                                                                                                                                                                                                                     | -0.41                | -0.52               | -0.29               | <0.0001        |
| Indonesian                                                                                                                                                                                                                                                                       | 0.17                 | 0.02                | 0.31                | 0.02           |
| Moroccan                                                                                                                                                                                                                                                                         | 0.13                 | 0.04                | 0.22                | 0.00           |
| Surinamese                                                                                                                                                                                                                                                                       | -0.45                | -0.53               | -0.37               | <0.0001        |
| Turkish                                                                                                                                                                                                                                                                          | -0.02                | -0.10               | 0.06                | 0.62           |
| Abbreviations: CI: Confidence Interval; NFBFC1986: Northern Finland Birth Cohort 1986; SD: Standard Deviation.<br>Birthweight was transformed into standard deviation (SD) scores corrected for gestational duration and sex using North European growth standards in the study. |                      |                     |                     |                |

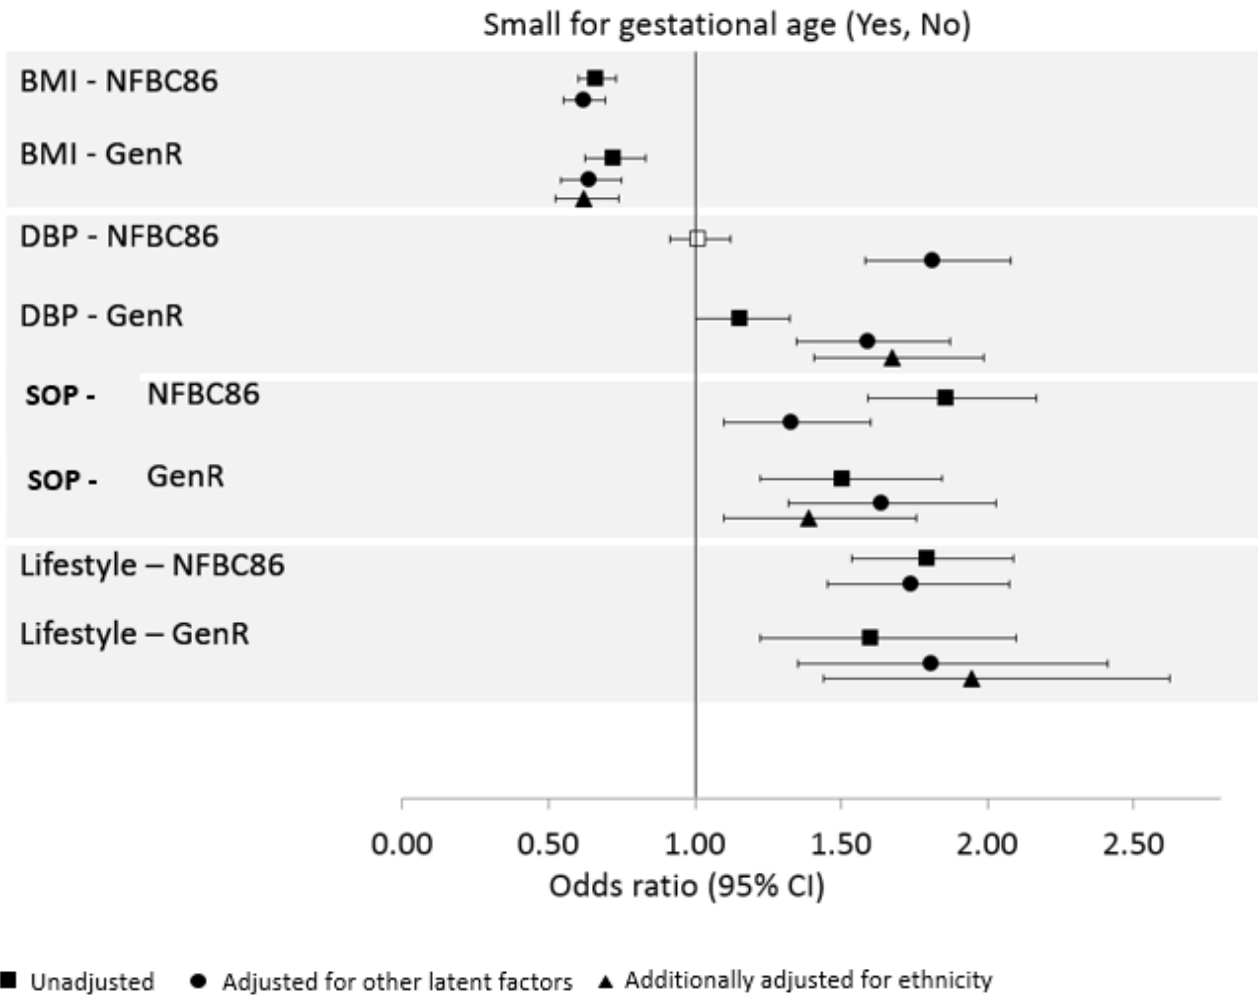

**Figure S4.** Sensitivity analysis showing forest plot of association of four latent factors with small for gestational age in the NFBC1986 and the Generation R Study

Note: Open symbol  $P > 0.05$  and closed symbol  $P < 0.05$ . Estimates = change in odds for SGA by one unit change in factor score

Abbreviations: BMI: Body Mass Index, CI: Confidence Interval, DBP: Diastolic Blood Pressure, NFBC86: Northern Finland Birth Cohort 1986; SOP: Socioeconomic Obstetric Profile.



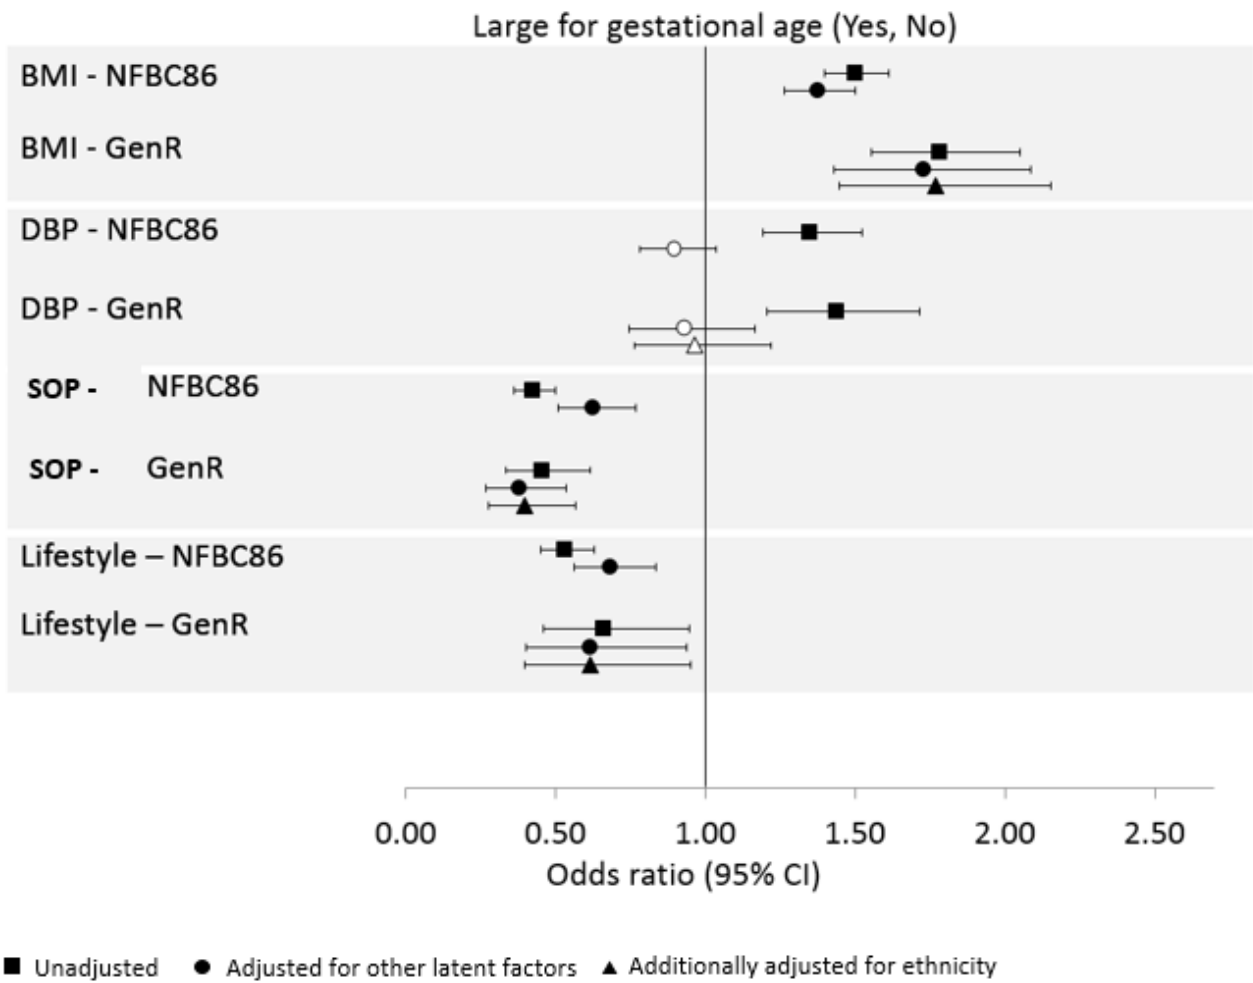

**Figure S5.** Sensitivity analysis showing forest plot of association of four latent factors with large for gestational age in the NFBC1986 and the Generation R Study

Note: Open symbol  $P > 0.05$  and closed symbol  $P < 0.05$ . Estimates = change in odds for LGA by one unit change in factor score

Abbreviations: BMI: Body Mass Index, CI: Confidence Interval, DBP: Diastolic Blood Pressure, NFBC86: Northern Finland Birth Cohort 1986; SOP: Socioeconomic Obstetric Profile.

**Table S7.** Sensitivity analysis of association of four latent factors: ‘Factor1-BMI’, ‘Factor2-DBP’, ‘Factor3-Socioeconomic-Obstetric Profile (SOP)’ and ‘Factor4-Parental-Lifestyle’ with SGA and LGA sequentially adjusted for other latent factors in the NFBC1986 and the Generation R study

| Latent factors                                      | NFBC 1986 |            |         |      |            |         | Generation R |            |         |      |            |         |
|-----------------------------------------------------|-----------|------------|---------|------|------------|---------|--------------|------------|---------|------|------------|---------|
|                                                     | SGA       |            |         | LGA  |            |         | SGA          |            |         | LGA  |            |         |
|                                                     | OR        | 95% CI     | P value | OR   | 95% CI     | P value | OR           | 95% CI     | P value | OR   | 95% CI     | P value |
| <b>Factor1-BMI (Model 1)</b>                        | 0.66      | 0.60, 0.73 | <0.0001 | 1.50 | 1.40, 1.61 | <0.0001 | 0.72         | 0.63, 0.83 | <0.0001 | 1.78 | 1.55, 2.05 | <0.0001 |
| +F2-DBP                                             | 0.58      | 0.52, 0.64 | <0.0001 | 1.50 | 1.38, 1.62 | <0.0001 | 0.58         | 0.49, 0.68 | <0.0001 | 1.85 | 1.55, 2.21 | <0.0001 |
| +F3-SOP                                             | 0.72      | 0.65, 0.80 | <0.0001 | 1.35 | 1.25, 1.46 | <0.0001 | 0.73         | 0.63, 0.84 | <0.0001 | 1.80 | 1.56, 2.07 | <0.0001 |
| +F4-Lifestyle                                       | 0.68      | 0.62, 0.75 | <0.0001 | 1.47 | 1.37, 1.58 | <0.0001 | 0.74         | 0.64, 0.85 | 0.0002  | 1.77 | 1.53, 2.05 | <0.0001 |
| +F2-DBP+F3-SOP                                      | 0.64      | 0.57, 0.71 | <0.0001 | 1.37 | 1.26, 1.49 | <0.0001 | 0.59         | 0.51, 0.70 | <0.0001 | 1.84 | 1.54, 2.21 | <0.0001 |
| +F2-DBP+ F4Lifestyle                                | 0.58      | 0.53, 0.65 | <0.0001 | 1.49 | 1.38, 1.61 | <0.0001 | 0.60         | 0.51, 0.70 | <0.0001 | 1.84 | 1.54, 2.21 | <0.0001 |
| +F4-Lifestyle+F3-SOP                                | 0.71      | 0.64, 0.78 | <0.0001 | 1.37 | 1.27, 1.48 | <0.0001 | 0.78         | 0.67, 0.90 | <0.0001 | 1.71 | 1.47, 1.99 | <0.0001 |
| +Adjusted for all latent factors ( <b>Model 2</b> ) | 0.61      | 0.55, 0.68 | <0.0001 | 1.40 | 1.29, 1.52 | <0.0001 | 0.63         | 0.54, 0.74 | <0.0001 | 1.75 | 1.45, 2.11 | <0.0001 |
| +Fully adjusted with ethnicity ( <b>Model 3</b> )   | -         | -          | -       | -    | -          | -       | 0.63         | 0.53, 0.75 | <0.0001 | 1.77 | 1.45, 2.16 | <0.0001 |
| <b>Factor2-DBP (Model 1)</b>                        | 1.01      | 0.91, 1.12 | 0.84    | 1.35 | 1.19, 1.52 | <0.0001 | 1.15         | 1.00, 1.33 | 0.05    | 1.44 | 1.21, 1.72 | <0.0001 |
| +F1-BMI                                             | 1.25      | 1.12, 1.83 | <0.0001 | 1.02 | 0.89, 1.16 | 0.82    | 1.56         | 1.33, 1.84 | <0.0001 | 0.93 | 0.74, 1.16 | 0.5     |
| +F3-SOP                                             | 1.40      | 1.23, 1.58 | <0.0001 | 1.13 | 0.99, 1.28 | 0.06    | 1.15         | 1.00, 1.33 | 0.05    | 1.46 | 1.22, 1.74 | <0.0001 |
| +F4-Lifestyle                                       | 1.33      | 1.17, 1.50 | <0.0001 | 1.24 | 1.09, 1.40 | 0.0007  | 1.20         | 1.04, 1.38 | 0.01    | 1.40 | 1.17, 1.68 | 0.0002  |
| +F2-BMI+F3-SOP                                      | 1.69      | 1.48, 1.93 | <0.0001 | 0.94 | 0.82, 1.08 | 0.41    | 1.55         | 1.31, 1.82 | <0.0001 | 0.95 | 0.77, 1.19 | 0.68    |
| +F1-BMI+F4-Lifestyle                                | 1.76      | 1.54, 2.02 | <0.0001 | 0.94 | 0.82, 1.08 | 0.38    | 1.58         | 1.34, 1.85 | <0.0001 | 0.93 | 0.74, 1.16 | 0.49    |
| +F3-SOP+F4-Lifestyle                                | 1.43      | 1.26, 1.63 | <0.0001 | 1.12 | 0.98, 1.27 | 0.09    | 1.22         | 1.06, 1.41 | 0.006   | 1.37 | 1.15, 1.64 | 0.0005  |
| +Adjusted for all latent factors ( <b>Model 2</b> ) | 1.78      | 1.56, 2.04 | <0.0001 | 0.92 | 0.80, 1.06 | 0.23    | 1.56         | 1.33, 1.84 | <0.0001 | 0.95 | 0.76, 1.19 | 0.67    |
| +Fully adjusted with ethnicity ( <b>Model 3</b> )   | -         | -          | -       | -    | -          | -       | 1.67         | 1.40, 1.98 | <0.0001 | 0.97 | 0.77, 1.22 | 0.78    |

|                                                     |      |            |         |      |            |         |      |            |         |      |            |         |
|-----------------------------------------------------|------|------------|---------|------|------------|---------|------|------------|---------|------|------------|---------|
| <b>Factor3-SOP (Model 1)</b>                        | 1.86 | 1.59, 2.17 | <0.0001 | 0.43 | 0.36, 0.50 | <0.0001 | 1.50 | 1.22, 1.84 | <0.0001 | 0.45 | 0.33, 0.61 | <0.0001 |
| +F1-BMI                                             | 1.54 | 1.31, 1.82 | <0.0001 | 0.55 | 0.46, 0.65 | <0.0001 | 1.44 | 1.17, 1.76 | 0.0005  | 0.45 | 0.33, 0.61 | <0.0001 |
| +F2-DBP                                             | 2.05 | 1.75, 2.40 | <0.0001 | 0.45 | 0.38, 0.53 | <0.0001 | 1.50 | 1.23, 1.85 | <0.0001 | 0.44 | 0.33, 0.60 | <0.0001 |
| +F4-SOP                                             | 1.57 | 1.32, 1.86 | <0.0001 | 0.48 | 0.40, 0.58 | <0.0001 | 1.74 | 1.41, 2.14 | <0.0001 | 0.35 | 0.25, 0.49 | <0.0001 |
| +F1-BMI+F2-DBP                                      | 1.67 | 1.41, 1.97 | <0.0001 | 0.54 | 0.46, 0.65 | <0.0001 | 1.41 | 1.15, 1.73 | 0.001   | 0.45 | 0.33, 0.61 | <0.0001 |
| +F1-BMI+F4-Lifestyle                                | 1.25 | 1.04, 1.51 | 0.02    | 0.65 | 0.53, 0.79 | <0.0001 | 1.63 | 1.32, 2.02 | <0.0001 | 0.40 | 0.28, 0.55 | <0.0001 |
| +F2-DBP+F4Lifestyle                                 | 1.72 | 1.44, 2.05 | <0.0001 | 0.50 | 0.41, 0.60 | <0.0001 | 1.76 | 1.43, 2.18 | <0.0001 | 0.36 | 0.26, 0.50 | <0.0001 |
| +Adjusted for all latent factors ( <b>Model 2</b> ) | 1.31 | 1.08, 1.58 | 0.005   | 0.65 | 0.53, 0.79 | <0.0001 | 1.61 | 1.30, 1.99 | <0.0001 | 0.40 | 0.29, 0.55 | <0.0001 |
| +Fully adjusted with ethnicity ( <b>Model 3</b> )   | -    | -          | -       | -    | -          | -       | 1.39 | 1.10, 1.75 | 0.006   | 0.40 | 0.28, 0.57 | <0.0001 |
|                                                     |      |            |         |      |            |         |      |            |         |      |            |         |
| <b>Factor4-Parental Lifestyle (Model 1)</b>         | 1.79 | 1.54, 2.09 | <0.0001 | 0.53 | 0.45, 0.63 | <0.0001 | 1.60 | 1.22, 2.10 | 0.0006  | 0.66 | 0.46, 0.95 | 0.02    |
| +F1-BMI                                             | 1.71 | 1.46, 2.00 | <0.0001 | 0.58 | 0.49, 0.69 | <0.0001 | 1.41 | 1.07, 1.86 | 0.01    | 0.95 | 0.65, 1.37 | 0.77    |
| +F2-DBP                                             | 1.92 | 1.64, 2.24 | <0.0001 | 0.56 | 0.47, 0.67 | <0.0001 | 1.69 | 1.29, 2.22 | 0.0002  | 0.73 | 0.51, 1.06 | 0.1     |
| +F3-SOP                                             | 1.46 | 1.23, 1.74 | <0.0001 | 0.77 | 0.63, 0.93 | 0.006   | 1.96 | 1.49, 2.59 | <0.0001 | 0.42 | 0.28, 0.62 | <0.0001 |
| +F1-BMI+F2-DBP                                      | 1.91 | 1.63, 2.24 | <0.0001 | 0.57 | 0.48, 0.68 | <0.0001 | 1.46 | 1.10, 1.92 | 0.008   | 0.94 | 0.65, 1.37 | 0.76    |
| +F1-BMI+F3-SOP                                      | 1.55 | 1.30, 1.85 | <0.0001 | 0.71 | 0.59, 0.87 | 0.0006  | 1.74 | 1.30, 2.31 | 0.0002  | 0.64 | 0.42, 0.96 | 0.03    |
| +F2-DBP+F3-SOP                                      | 1.52 | 1.28, 1.81 | <0.0001 | 0.78 | 0.64, 0.94 | 0.009   | 2.08 | 1.58, 2.75 | <0.0001 | 0.47 | 0.31, 0.70 | 0.0002  |
| +Adjusted for all latent factors ( <b>Model 2</b> ) | 1.71 | 1.43, 2.04 | <0.0001 | 0.70 | 0.58, 0.86 | 0.0004  | 1.78 | 1.33, 2.37 | 0.0004  | 0.64 | 0.42, 0.96 | 0.04    |
| +Fully adjusted with ethnicity ( <b>Model 3</b> )   | -    | -          | -       | -    | -          | -       | 1.93 | 1.44, 2.60 | <0.0001 | 0.62 | 0.40, 0.95 | 0.03    |

Birthweight was transformed into standard deviation (SD) scores corrected for gestational duration and sex using North European growth standards in the study. SGA was defined as birth weight  $\leq -2$  SD score and LGA as  $\geq 2$  SD score.

Abbreviations: BMI: Body Mass Index; CI: Confidence Interval; DBP: Diastolic Blood Pressure; F1: Factor1; F2: Factor 2; F3: Factor 3; F4: Factor4; LGA: Large for Gestational Age; NFBC1986: Northern Finland Birth Cohort 1986; SD: Standard Deviation; SGA: Small for Gestational Age; SOP: Socioeconomic-Obstetric-Profile.
